# Supplementary material
Source: publisher site journal article supplement (https://www.dovepress.com/article/161151)
Supplement: Supplementary file 1 [file get_supplementary_file.php]

## **PART A – Inclusion / Exclusion Criteria**

### ***Inclusion Criteria***

- Article is published in English language.
- Article describes a study conducted using a prospective study design i.e. one of a randomized controlled trial, longitudinal study, or a cohort study.
- Article should determine primary non-adherence i.e. failure to start a new medication after first prescription.
- Article should determine the proportion of adherence to the meds for chronic diseases over a defined period.
- Primary non-adherence should be objectively determined.

### ***Exclusion Criteria***

- Opinion papers, letters to the editor, case reports or case studies, study protocols.
- Articles describing secondary adherence only.
- Articles based on non-human participants.

**PART B – Influence Analysis**

| <b>OMITTED</b>                     | <b>ESTIMATE</b>  | <b>95% CONFIDENCE INTERVAL</b> |                  |
|------------------------------------|------------------|--------------------------------|------------------|
| Aznar-Lou et al (a)                | .14680195        | .13060302                      | .16300087        |
| Aznar-Lou et al (b)                | .14835356        | .13104442                      | .16566272        |
| Aznar-Lou et al (c)                | .14806619        | .13074224                      | .16539013        |
| Aznar-Lou et al (d)                | .14746183        | .13014154                      | .16478211        |
| Bauer et al                        | .14877315        | .1326372                       | .16490911        |
| Casebeer et al                     | .14055401        | .12461548                      | .15649255        |
| Chan et al (b)                     | .14235500        | .12641083                      | .15829918        |
| Chan et al (c)                     | .13393182        | .11923514                      | .14862849        |
| Cheetham et al                     | .14629282        | .13016278                      | .16242285        |
| Derosé et al                       | .14560869        | .12954313                      | .16167426        |
| Ewen et al                         | .14912379        | .13300769                      | .16523990        |
| Fischer, Jones et al (a)           | .14822248        | .13209343                      | .16435152        |
| Fischer, Jones et al (b)           | .14899170        | .13288683                      | .16509658        |
| Fischer, Jones et al (c)           | .14823902        | .13210379                      | .16437425        |
| Fischer, Stedman et al (a)         | .14480911        | .12884443                      | .16077378        |
| Fischer, Stedman et al (b)         | .14522164        | .12967567                      | .16076761        |
| Fischer, Stedman et al (c)         | .14520936        | .12934323                      | .16107550        |
| Fischer, Stedman et al (d)         | .14486678        | .12906505                      | .16066849        |
| Freccero et al                     | .14641154        | .13025567                      | .16256742        |
| Geffen et al                       | .14876515        | .13263175                      | .16489854        |
| Jackevicius et al (a)              | .14662950        | .13053344                      | .16272554        |
| Jackevicius et al (b)              | .14831889        | .13210084                      | .16453692        |
| Jackevicius et al (c)              | .14855258        | .13241504                      | .16469011        |
| Jackevicius et al (d)              | .14498843        | .12897205                      | .16100481        |
| Karter et al (a)                   | .14884309        | .13273099                      | .16495520        |
| Karter et al (b)                   | .14895539        | .13311277                      | .16479802        |
| Karter et al (c)                   | .14786728        | .13161989                      | .16411467        |
| Kerner et al                       | .14623559        | .13025689                      | .16221428        |
| Linnet et al (a)                   | .14775907        | .13161831                      | .16389981        |
| Linnet et al (b)                   | .14783546        | .13162972                      | .16404122        |
| Linnet et al (d)                   | .14827728        | .13207093                      | .16448364        |
| O'Connor et al                     | .14676714        | .1306181                       | .16291618        |
| Raebel et al (a)                   | .14720088        | .13105096                      | .16335079        |
| Raebel et al (b)                   | .14819457        | .13198103                      | .16440810        |
| Raebel et al (c)                   | .14693247        | .1307546                       | .16311033        |
| Shah, Hirsch, Zacker, Taylor et al | .14638244        | .13025364                      | .16251121        |
| Shah, Hirsch, Zacker, Wood et al   | .14590682        | .12979829                      | .16201533        |
| Shin et al (a)                     | .14696507        | .13068844                      | .16324170        |
| Shin et al (b)                     | .14821562        | .13123952                      | .16519174        |
| Shin et al (c)                     | .14452475        | .12916258                      | .15988693        |
| Shin et al (d)                     | .14814284        | .13152760                      | .16475809        |
| Tamblyn et al (a)                  | .14341226        | .12736300                      | .15946154        |
| Tamblyn et al (b)                  | .14253594        | .12670778                      | .15836412        |
| Tamblyn et al (c)                  | .14223514        | .12640832                      | .15806195        |
| Thengilsdottir et al (c)           | .14835218        | .13218771                      | .16451664        |
| Thengilsdottir et al (d)           | .14799057        | .13170432                      | .16427682        |
| Trinacty et al                     | .14749266        | .13133137                      | .16365394        |
| Xing et al                         | .14678700        | .13066050                      | .16291352        |
| <b>POOLED ESTIMATE</b>             | <b>.14646214</b> | <b>.13050745</b>               | <b>.16241683</b> |

*a – Hypoglycemics;*

*c – Lipid lowering medications;*

*b – Antihypertensives;*

*d – Antidepressants*

**PART C – Search Strategies**

**CINAHL**

| #   | Query                                                                                                                                                                                                                                                                                                                                                                                                                                                                                                                                                                                                                                                                                                                      | Limiters/Expanders            | Last Run Via                                                                                                   | Results |
|-----|----------------------------------------------------------------------------------------------------------------------------------------------------------------------------------------------------------------------------------------------------------------------------------------------------------------------------------------------------------------------------------------------------------------------------------------------------------------------------------------------------------------------------------------------------------------------------------------------------------------------------------------------------------------------------------------------------------------------------|-------------------------------|----------------------------------------------------------------------------------------------------------------|---------|
| S15 | S10 AND S14                                                                                                                                                                                                                                                                                                                                                                                                                                                                                                                                                                                                                                                                                                                | Search modes - Boolean/Phrase | Interface - EBSCOhost Research Databases<br>Search Screen - Basic Search Database - CINAHL Plus with Full Text | 63      |
| S14 | S11 OR S12 OR S13                                                                                                                                                                                                                                                                                                                                                                                                                                                                                                                                                                                                                                                                                                          | Search modes - Boolean/Phrase | Interface - EBSCOhost Research Databases<br>Search Screen - Basic Search Database - CINAHL Plus with Full Text | 648     |
| S13 | TI ((primary w3 adherence) or (primary w3 non-adherence) or (primary w3 compliance) or (primary w3 non-compliance) or (baseline w3 adherence) or (baseline w3 non-adherence) or (baseline w3 compliance) or (baseline w3 non-compliance) or (initial w3 adherence) or (initial w3 non-adherence) or (initial w3 compliance) or (initial w3 non-compliance)) OR AB ((primary w3 adherence) or (primary w3 non-adherence) or (primary w3 compliance) or (primary w3 non-compliance) or (baseline w3 adherence) or (baseline w3 non-adherence) or (baseline w3 compliance) or (baseline w3 non-compliance) or (initial w3 adherence) or (initial w3 non-adherence) or (initial w3 compliance) or (initial w3 non-compliance)) | Search modes - Boolean/Phrase | Interface - EBSCOhost Research Databases<br>Search Screen - Basic Search Database - CINAHL Plus with Full Text | 648     |
| S12 | TI ("primary medication adherence" or "primary medication compliance" or "primary medication non-adherence" or "primary medication non-compliance" or "baseline medication adherence" or "baseline medication compliance" or "baseline medication non-adherence" or "baseline medication non-compliance" or "initial medication adherence" or "initial medication compliance" or "initial medication non-adherence" or "initial                                                                                                                                                                                                                                                                                            | Search modes - Boolean/Phrase | Interface - EBSCOhost Research Databases<br>Search Screen - Basic Search Database - CINAHL Plus with Full Text | 19      |

|     |                                                                                                                                                                                                                                                                                                                                                                                                                                                                                                                                                                                                                                                                                                                                                                                                                                                                                                                                                                                                                                                                                                                                                                                                                                                                       |                                      |                                                                                                                        |            |
|-----|-----------------------------------------------------------------------------------------------------------------------------------------------------------------------------------------------------------------------------------------------------------------------------------------------------------------------------------------------------------------------------------------------------------------------------------------------------------------------------------------------------------------------------------------------------------------------------------------------------------------------------------------------------------------------------------------------------------------------------------------------------------------------------------------------------------------------------------------------------------------------------------------------------------------------------------------------------------------------------------------------------------------------------------------------------------------------------------------------------------------------------------------------------------------------------------------------------------------------------------------------------------------------|--------------------------------------|------------------------------------------------------------------------------------------------------------------------|------------|
|     | <p>medication non-compliance" or "primary drug adherence" or "primary drug compliance" or "primary drug non-adherence" or "primary drug non-compliance" or "baseline drug adherence" or "baseline drug compliance" or "baseline drug non-adherence" or "baseline drug non-compliance" or "initial drug adherence" or "initial drug compliance" or "initial drug non-adherence" or "initial drug non-compliance") OR AB ("primary medication adherence" or "primary medication compliance" or "primary medication non-adherence" or "primary medication non-compliance" or "baseline medication adherence" or "baseline medication compliance" or "baseline medication non-adherence" or "baseline medication non-compliance" or "initial medication adherence" or "initial medication compliance" or "initial medication non-adherence" or "initial medication non-compliance" or "primary drug adherence" or "primary drug compliance" or "primary drug non-adherence" or "primary drug non-compliance" or "baseline drug adherence" or "baseline drug compliance" or "baseline drug non-adherence" or "baseline drug non-compliance" or "initial drug adherence" or "initial drug compliance" or "initial drug non-adherence" or "initial drug non-compliance")</p> |                                      |                                                                                                                        |            |
| S11 | <p>TI ("primary adherence" or "primary compliance" or "primary non-adherence" or "primary non-compliance" or "baseline adherence" or "baseline compliance" or "baseline non-adherence" or "initial adherence" or "initial compliance" or "initial non-compliance") OR AB</p>                                                                                                                                                                                                                                                                                                                                                                                                                                                                                                                                                                                                                                                                                                                                                                                                                                                                                                                                                                                          | <p>Search modes - Boolean/Phrase</p> | <p>Interface - EBSCOhost Research Databases<br/>Search Screen - Basic Search Database - CINAHL Plus with Full Text</p> | <p>185</p> |

|     |                                                                                                                                                                                                                                                                                                                                                                                                                                                                                                                                |                               |                                                                                                                |        |
|-----|--------------------------------------------------------------------------------------------------------------------------------------------------------------------------------------------------------------------------------------------------------------------------------------------------------------------------------------------------------------------------------------------------------------------------------------------------------------------------------------------------------------------------------|-------------------------------|----------------------------------------------------------------------------------------------------------------|--------|
|     | ("primary adherence" or "primary compliance" or "primary non-adherence" or "primary non-compliance" or "baseline adherence" or "baseline compliance" or "baseline non-adherence" or "initial adherence" or "initial compliance" or "initial non-compliance")                                                                                                                                                                                                                                                                   |                               |                                                                                                                |        |
| S10 | S1 OR S2 OR S3 OR S4 OR S5 OR S6 OR S7 OR S8 OR S9                                                                                                                                                                                                                                                                                                                                                                                                                                                                             | Search modes - Boolean/Phrase | Interface - EBSCOhost Research Databases<br>Search Screen - Basic Search Database - CINAHL Plus with Full Text | 84,904 |
| S9  | TI (antidepressants or antidepressive agent or monoamine oxidase inhibitors or selective serotonin reuptake inhibitors or SSRIs or selegiline or paroxetine or serotonin or sertraline or tricyclic antidepressant or TCAs or amitriptyline or nortriptyline) OR AB (antidepressants or antidepressive agent or monoamine oxidase inhibitors or selective serotonin reuptake inhibitors or SSRIs or selegiline or paroxetine or serotonin or sertraline or tricyclic antidepressant or TCAs or amitriptyline or nortriptyline) | Search modes - Boolean/Phrase | Interface - EBSCOhost Research Databases<br>Search Screen - Basic Search Database - CINAHL Plus with Full Text | 16,098 |
| S8  | MH antidepressive agents                                                                                                                                                                                                                                                                                                                                                                                                                                                                                                       | Search modes - Boolean/Phrase | Interface - EBSCOhost Research Databases<br>Search Screen - Basic Search Database - CINAHL Plus with Full Text | 10,732 |
| S7  | TI (statins or antilipids or atorvastatin or fluvastatin or lovastatin or rosuvastatin or simvastatin or pravastatin) OR AB (statins or antilipids or atorvastatin or fluvastatin or lovastatin or rosuvastatin or simvastatin or pravastatin)                                                                                                                                                                                                                                                                                 | Search modes - Boolean/Phrase | Interface - EBSCOhost Research Databases<br>Search Screen - Basic Search Database - CINAHL Plus with Full Text | 10,029 |
| S6  | MH statins                                                                                                                                                                                                                                                                                                                                                                                                                                                                                                                     | Search modes - Boolean/Phrase | Interface - EBSCOhost Research Databases<br>Search Screen - Basic Search Database - CINAHL Plus with Full Text | 6,557  |
| S5  | TI (nitroglycerin or morphine or aspirin or warfarin or digoxin) OR AB (nitroglycerin or morphine or aspirin or warfarin or digoxin)                                                                                                                                                                                                                                                                                                                                                                                           | Search modes - Boolean/Phrase | Interface - EBSCOhost Research Databases<br>Search Screen - Basic Search Database - CINAHL Plus with Full Text | 19,603 |
| S4  | TI (antihypertensive or furosemide or lisinopril or ramipril or captopril or                                                                                                                                                                                                                                                                                                                                                                                                                                                   | Search modes - Boolean/Phrase | Interface - EBSCOhost Research Databases<br>Search Screen - Basic Search                                       | 9,873  |

|    |                                                                                                                                                                                                                                                                                |                               |                                                                                                                |        |
|----|--------------------------------------------------------------------------------------------------------------------------------------------------------------------------------------------------------------------------------------------------------------------------------|-------------------------------|----------------------------------------------------------------------------------------------------------------|--------|
|    | amlodipine or nifedipine or atenolol or metoprolol) OR AB (antihypertensive or furosemide or lisinopril or ramipril or captopril or amlodipine or nifedipine or atenolol or metoprolol)                                                                                        |                               | Database - CINAHL Plus with Full Text                                                                          |        |
| S3 | MH antihypertensive agents                                                                                                                                                                                                                                                     | Search modes - Boolean/Phrase | Interface - EBSCOhost Research Databases<br>Search Screen - Basic Search Database - CINAHL Plus with Full Text | 10,211 |
| S2 | TI (anti-diabetics or oral hypoglycemics or antihyperglycemics or glimepiride or glipizide or glyburide or metformin or pioglitazone) OR AB (anti-diabetics or oral hypoglycemics or antihyperglycemics or glimepiride or glipizide or glyburide or metformin or pioglitazone) | Search modes - Boolean/Phrase | Interface - EBSCOhost Research Databases<br>Search Screen - Basic Search Database - CINAHL Plus with Full Text | 6,240  |
| S1 | MH hypoglycemic agents                                                                                                                                                                                                                                                         | Search modes - Boolean/Phrase | Interface - EBSCOhost Research Databases<br>Search Screen - Basic Search Database - CINAHL Plus with Full Text | 11,478 |

## COCHRANE CENTRAL

ID Search Hits

#1 MeSH descriptor: [Hypoglycemic Agents] explode all trees 6871

#2 anti-diabetics or "oral hypoglycemics" or antihyperglycemics or glimepiride or glipizide or glyburide or metformin or pioglitazone:ti,ab,kw (Word variations have been searched) 6937

#3 MeSH descriptor: [Antihypertensive Agents] explode all trees 7595

#4 antihypertensive or furosemide or lisinopril or ramipril or captopril or amlodipine or nifedipine or atenolol or metoprolol:ti,ab,kw (Word variations have been searched) 27033

#5 nitroglycerin or morphine or aspirin or warfarin or digoxin:ti,ab,kw (Word variations have been searched) 26510

#6 MeSH descriptor: [Hydroxymethylglutaryl-CoA Reductase Inhibitors] explode all trees 3372

#7 statins or antilipids or atorvastatin or fluvastatin or lovastatin or rosuvastatin or simvastatin or pravastatin:ti,ab,kw (Word variations have been searched) 9731

#8 MeSH descriptor: [Antidepressive Agents] explode all trees 5628

#9 antidepressants or "antidepressive agent" or "monoamine oxidase inhibitors" or "selective serotonin reuptake inhibitors" or SSRIs or selegiline or paroxetine or serotonin or sertraline or "tricyclic antidepressant" or TCAs or amitriptyline or nortriptyline:ti,ab,kw (Word variations have been searched) 22470

#10 #1 or #2 or #3 or #4 or #5 or #6 or #7 or #8 or #9 93920

#11 "primary adherence" or "primary compliance" or "primary non-adherence" or "primary non-compliance" or "baseline adherence" or "baseline compliance" or "baseline non-adherence" or "baseline non-compliance" or "initial adherence" or "initial compliance" or "initial non-adherence" or "initial non-compliance" 201

#12 (primary adj3 adherence) or (primary adj3 non-adherence) or (primary adj3 compliance) or (primary adj3 non-compliance) or (baseline adj3 adherence) or (baseline adj3 non-adherence) or (baseline adj3 compliance) or (baseline adj3 non-compliance) or (initial adj3 adherence) or (initial adj3 non-adherence) or (initial adj3 compliance) or (initial adj3 non-compliance) 1257

#13 "primary medication adherence" or "primary medication compliance" or "primary medication non-adherence" or "primary medication non-compliance" or "baseline medication adherence" or "baseline medication compliance" or "baseline medication non-adherence" or "baseline medication non-compliance" or "initial medication adherence" or "initial medication compliance" or "initial medication non-adherence" or "initial medication non-compliance" or "primary drug adherence" or "primary drug compliance" or "primary drug non-adherence" or "primary drug non-compliance" or "baseline drug adherence" or "baseline drug compliance" or "baseline drug non-adherence" or "baseline drug non-compliance" or "initial drug adherence" or "initial drug compliance" or "initial drug non-adherence" or "initial drug non-compliance" 13

#14 #11 or #12 or #13 1436

#15 #10 and #14 in Trials 20

## EMBASE

1. exp antidiabetic agent/
2. (anti-diabetics or oral hypoglycemics or antihyperglycemics or glimepiride or glipizide or glyburide or metformin or pioglitazone).mp. [mp=title, abstract, heading word, drug trade name, original title, device manufacturer, drug manufacturer, device trade name, keyword, floating subheading word]
3. exp antihypertensive agent/
4. (antihypertensive or furosemide or lisinopril or ramipril or captopril or amlodipine or nifedipine or atenolol or metoprolol).mp. [mp=title, abstract, heading word, drug trade name, original title, device manufacturer, drug manufacturer, device trade name, keyword, floating subheading word]
5. (nitroglycerin or morphine or aspirin or warfarin or digoxin).mp. [mp=title, abstract, heading word, drug trade name, original title, device manufacturer, drug manufacturer, device trade name, keyword, floating subheading word]
6. exp hydroxymethylglutaryl coenzyme A reductase inhibitor/
7. (statins or antilipids or atorvastatin or fluvastatin or lovastatin or rosuvastatin or simvastatin or pravastatin).mp. [mp=title, abstract, heading word, drug trade name, original title, device manufacturer, drug manufacturer, device trade name, keyword, floating subheading word]
8. exp antidepressant agent/
9. (antidepressants or antidepressive agent or monoamine oxidase inhibitors or selective serotonin reuptake inhibitors or SSRIs or selegiline or paroxetine or serotonin or sertraline or tricyclic antidepressant or TCAs or amitriptyline or nortriptyline).mp. [mp=title, abstract, heading word, drug trade name, original title, device manufacturer, drug manufacturer, device trade name, keyword, floating subheading word]
10. 1 or 2 or 3 or 4 or 5 or 6 or 7 or 8 or 9
11. ("primary adherence" or "primary compliance" or "primary non-adherence" or "primary non-compliance" or "baseline adherence" or "baseline compliance" or "baseline non-adherence" or "baseline non-compliance" or "initial adherence" or "initial compliance" or "initial non-adherence" or "initial non-compliance" or (primary adj3 adherence) or (primary adj3 non-adherence) or (primary adj3 compliance) or (primary adj3 non-compliance) or (baseline adj3 adherence) or (baseline adj3 non-adherence) or (baseline adj3 compliance) or (baseline adj3 non-compliance) or (initial adj3 adherence) or (initial adj3 non-adherence) or (initial adj3 compliance) or (initial adj3 non-compliance)).mp. [mp=title, abstract, heading word, drug trade name, original title, device manufacturer, drug manufacturer, device trade name, keyword, floating subheading word]
12. ("primary medication adherence" or "primary medication compliance" or "primary medication non-adherence" or "primary medication non-compliance" or "baseline medication adherence" or "baseline medication compliance" or "baseline medication non-adherence" or "baseline medication non-compliance" or "initial medication adherence" or "initial medication compliance" or "initial medication non-adherence" or "initial medication non-compliance" or "primary drug adherence" or "primary drug compliance" or "primary drug non-adherence" or "primary drug non-compliance" or "baseline drug adherence" or "baseline drug

compliance" or "baseline drug non-adherence" or "baseline drug non-compliance" or "initial drug adherence" or "initial drug compliance" or "initial drug non-adherence" or "initial drug non-compliance").mp. [mp=title, abstract, heading word, drug trade name, original title, device manufacturer, drug manufacturer, device trade name, keyword, floating subheading word]

13. 11 or 12

14. 10 and 13

## MEDLINE

1. exp Hypoglycemic Agents/

2. (anti-diabetics or oral hypoglycemics or antihyperglycemics or glimepiride or glipizide or glyburide or metformin or pioglitazone).mp. [mp=title, abstract, original title, name of substance word, subject heading word, keyword heading word, protocol supplementary concept word, rare disease supplementary concept word, unique identifier, synonyms]

3. exp Antihypertensive Agents/

4. (antihypertensive or furosemide or lisinopril or ramipril or captopril or amlodipine or nifedipine or atenolol or metoprolol).mp. [mp=title, abstract, original title, name of substance word, subject heading word, keyword heading word, protocol supplementary concept word, rare disease supplementary concept word, unique identifier, synonyms]

5. (nitroglycerin or morphine or aspirin or warfarin or digoxin).mp. [mp=title, abstract, original title, name of substance word, subject heading word, keyword heading word, protocol supplementary concept word, rare disease supplementary concept word, unique identifier, synonyms]

6. exp Hydroxymethylglutaryl-CoA Reductase Inhibitors/

7. (statins or antilipids or atorvastatin or fluvastatin or lovastatin or rosuvastatin or simvastatin or pravastatin).mp. [mp=title, abstract, original title, name of substance word, subject heading word, keyword heading word, protocol supplementary concept word, rare disease supplementary concept word, unique identifier, synonyms]

8. exp Antidepressive Agents/

9. (antidepressants or antidepressive agent or monoamine oxidase inhibitors or selective serotonin reuptake inhibitors or SSRIs or selegiline or paroxetine or serotonin or sertraline or tricyclic antidepressant or TCAs or amitriptyline or nortriptyline).mp. [mp=title, abstract, original title, name of substance word, subject heading word, keyword heading word, protocol supplementary concept word, rare disease supplementary concept word, unique identifier, synonyms]

10. 1 or 2 or 3 or 4 or 5 or 6 or 7 or 8 or 9

11. ("primary adherence" or "primary compliance" or "primary non-adherence" or "primary non-compliance" or "baseline adherence" or "baseline compliance" or "baseline non-adherence" or "baseline non-compliance" or "initial adherence" or "initial compliance" or "initial non-adherence" or "initial non-compliance" or (primary adj3 adherence) or (primary adj3 non-adherence) or (primary adj3 compliance) or (primary adj3 non-compliance) or (baseline adj3 adherence) or (baseline adj3 non-adherence) or (baseline adj3 compliance) or (baseline adj3 non-compliance) or (initial adj3 adherence) or (initial adj3 non-adherence) or (initial adj3 compliance) or (initial adj3 non-compliance)).mp. [mp=title, abstract, original title, name of substance word, subject heading word, keyword heading word, protocol supplementary concept word, rare disease supplementary concept word, unique identifier, synonyms]

12. ("primary medication adherence" or "primary medication compliance" or "primary medication non-adherence" or "primary medication non-compliance" or "baseline medication adherence" or "baseline medication compliance" or "baseline medication non-adherence" or "baseline medication non-compliance" or "initial medication adherence" or "initial medication compliance" or "initial medication non-adherence" or "initial medication non-compliance" or "primary drug adherence" or "primary drug compliance" or "primary drug non-adherence" or "primary drug non-compliance" or "baseline drug adherence" or "baseline drug compliance" or "baseline drug non-adherence" or "baseline drug non-compliance" or "initial drug adherence" or "initial drug compliance" or "initial drug non-adherence" or "initial drug non-compliance").mp. [mp=title, abstract, original title, name of substance word, subject heading word, keyword heading word, protocol supplementary concept word, rare disease supplementary concept word, unique identifier, synonyms]

13. 11 or 12



## PROQUEST

((anti-diabetics or "oral hypoglycemics" or antihyperglycemics or glimepiride or glipizide or glyburide or metformin or pioglitazone) OR (antihypertensive or furosemide or lisinopril or ramipril or captopril or amlodipine or nifedipine or atenolol or metoprolol) OR (nitroglycerin or morphine or aspirin or warfarin or digoxin) OR (statins or antilipids or atorvastatin or fluvastatin or lovastatin or rosuvastatin or simvastatin or pravastatin) OR (antidepressants or "antidepressive agent" or "monoamine oxidase inhibitors" or "selective serotonin reuptake inhibitors" or SSRIs or selegiline or paroxetine or serotonin or sertraline or "tricyclic antidepressant" or TCAs or amitriptyline or nortriptyline)) AND (("primary adherence" or "primary compliance" or "primary non-adherence" or "primary non-compliance" or "baseline adherence" or "baseline compliance" or "baseline non-adherence" or "baseline non-compliance" or "initial adherence" or "initial compliance" or "initial non-adherence" or "initial non-compliance") OR ("primary medication adherence" or "primary medication compliance" or "primary medication non-adherence" or "primary medication non-compliance" or "baseline medication adherence" or "baseline medication compliance" or "baseline medication non-adherence" or "baseline medication non-compliance" or "initial medication adherence" or "initial medication compliance" or "initial medication non-adherence" or "initial medication non-compliance" or "primary drug adherence" or "primary drug compliance" or "primary drug non-adherence" or "primary drug non-compliance" or "baseline drug adherence" or "baseline drug compliance" or "baseline drug non-adherence" or "baseline drug non-compliance" or "initial drug adherence" or "initial drug compliance" or "initial drug non-adherence" or "initial drug non-compliance"))

## PSYCINFO

1. (anti-diabetics or oral hypoglycemics or antihyperglycemics or glimepiride or glipizide or glyburide or metformin or pioglitazone).mp. [mp=title, abstract, heading word, table of contents, key concepts, original title, tests & measures]
2. exp Antihypertensive Drugs/
3. (antihypertensive or furosemide or lisinopril or ramipril or captopril or amlodipine or nifedipine or atenolol or metoprolol).mp. [mp=title, abstract, heading word, table of contents, key concepts, original title, tests & measures]
4. (nitroglycerin or morphine or aspirin or warfarin or digoxin).mp. [mp=title, abstract, heading word, table of contents, key concepts, original title, tests & measures]
5. exp STATINS/
6. (statins or antilipids or atorvastatin or fluvastatin or lovastatin or rosuvastatin or simvastatin or pravastatin).mp. [mp=title, abstract, heading word, table of contents, key concepts, original title, tests & measures]
7. exp Antidepressant Drugs/ or exp Serotonin Reuptake Inhibitors/ or exp Fluoxetine/
8. (antidepressants or antidepressive agent or monoamine oxidase inhibitors or selective serotonin reuptake inhibitors or SSRIs or selegiline or paroxetine or serotonin or sertraline or tricyclic antidepressant or TCAs or amitriptyline or nortriptyline).mp. [mp=title, abstract, heading word, table of contents, key concepts, original title, tests & measures]
9. 1 or 2 or 3 or 4 or 5 or 6 or 7 or 8
10. ("primary adherence" or "primary compliance" or "primary non-adherence" or "primary non-compliance" or "baseline adherence" or "baseline compliance" or "baseline non-adherence" or "baseline non-compliance" or "initial adherence" or "initial compliance" or "initial non-adherence" or "initial non-compliance" or (primary adj3 adherence) or (primary adj3 non-adherence) or (primary adj3 compliance) or (primary adj3 non-compliance) or (baseline adj3 adherence) or (baseline adj3 non-adherence) or (baseline adj3 compliance) or (baseline adj3 non-compliance) or (initial adj3 adherence) or (initial adj3 non-adherence) or (initial adj3

compliance) or (initial adj3 non-compliance)).mp. [mp=title, abstract, heading word, table of contents, key concepts, original title, tests & measures]

11. ("primary medication adherence" or "primary medication compliance" or "primary medication non-adherence" or "primary medication non-compliance" or "baseline medication adherence" or "baseline medication compliance" or "baseline medication non-adherence" or "baseline medication non-compliance" or "initial medication adherence" or "initial medication compliance" or "initial medication non-adherence" or "initial medication non-compliance" or "primary drug adherence" or "primary drug compliance" or "primary drug non-adherence" or "primary drug non-compliance" or "baseline drug adherence" or "baseline drug compliance" or "baseline drug non-adherence" or "baseline drug non-compliance" or "initial drug adherence" or "initial drug compliance" or "initial drug non-adherence" or "initial drug non-compliance").mp. [mp=title, abstract, heading word, drug trade name, original title, device manufacturer, drug manufacturer, device trade name, keyword, floating subheading word]

12. 10 or 11

13. 9 and 12

## **PUBMED**

(((((anti-diabetics or "oral hypoglycemics" or antihyperglycemics or glimepiride or glipizide or glyburide or metformin or pioglitazone)) OR (antihypertensive or furosemide or lisinopril or ramipril or captopril or amlodipine or nifedipine or atenolol or metoprolol)) OR (nitroglycerin or morphine or aspirin or warfarin or digoxin)) OR (statins or antilipids or atorvastatin or fluvastatin or lovastatin or rosuvastatin or simvastatin or pravastatin)) OR (antidepressants or "antidepressive agent" or "monoamine oxidase inhibitors" or "selective serotonin reuptake inhibitors" or SSRIs or selegiline or paroxetine or serotonin or sertraline or "tricyclic antidepressant" or TCAs or amitriptyline or nortriptyline))) AND (("primary adherence" or "primary compliance" or "primary non-adherence" or "primary non-compliance" or "baseline adherence" or "baseline compliance" or "baseline non-adherence" or "baseline non-compliance" or "initial adherence" or "initial compliance" or "initial non-compliance" or "primary medication adherence" or "baseline medication adherence" or "initial medication adherence"))

## **SCOPUS**

(( ( TITLE-ABS-KEY ( anti-diabetics OR "oral hypoglycemics" OR antihyperglycemics OR glimepiride OR glipizide OR glyburide OR metformin OR pioglitazone ) ) OR ( TITLE-ABS-KEY ( antihypertensive OR furosemide OR lisinopril OR ramipril OR captopril OR amlodipine OR nifedipine OR atenolol OR metoprolol ) ) OR ( TITLE-ABS-KEY ( nitroglycerin OR morphine OR aspirin OR warfarin OR digoxin ) ) OR ( TITLE-ABS-KEY ( statins OR antilipids OR atorvastatin OR fluvastatin OR lovastatin OR rosuvastatin OR simvastatin OR pravastatin ) ) OR ( TITLE-ABS-KEY ( antidepressants OR "antidepressive agent" OR "monoamine oxidase inhibitors" OR "selective serotonin reuptake inhibitors" OR SSRIs OR selegiline OR paroxetine OR serotonin OR sertraline OR "tricyclic antidepressant" OR TCAs OR amitriptyline OR nortriptyline ) ) ) AND ( ( TITLE-ABS-KEY ( "primary adherence" OR "primary compliance" OR "primary non-adherence" OR "primary non-compliance" OR "baseline adherence" OR "baseline compliance" OR "baseline non-adherence" OR "baseline non-compliance" OR "initial adherence" OR "initial compliance" ) ) OR ( TITLE-ABS-KEY ( "initial non-adherence" OR "initial non-compliance" OR "primary medication adherence" OR "primary medication compliance" OR "primary medication non-adherence" OR "primary medication non-compliance" OR "baseline medication adherence" ) ) OR ( TITLE-ABS-KEY ( "baseline medication compliance" OR "baseline medication non-adherence" OR "baseline medication non-compliance" OR "initial medication adherence" OR "initial medication compliance" OR "initial medication non-adherence" ) ) OR ( TITLE-ABS-KEY ( ( primary PRE/3 adherence ) OR ( primary PRE/3 non-adherence ) OR ( primary PRE/3 compliance ) OR ( primary PRE/3 non-compliance ) OR ( baseline PRE/3 adherence ) OR ( baseline PRE/3 non-adherence ) ) ) OR ( TITLE-ABS-KEY ( ( baseline PRE/3 compliance ) OR ( baseline PRE/3 non-compliance ) OR ( initial PRE/3 adherence ) OR ( initial PRE/3 non-adherence ) OR ( initial PRE/3 compliance ) OR ( initial PRE/3 non-compliance ) ) ) )
